# Supplementary material
Source: publisher figshare collection journal article supplement (https://diabetesjournals.figshare.com/articles/dataset/_/21397506)
Supplement: Supplementary file 1 [file 1]

## TABLES

**Table 1.** Demographic, clinical characteristics and glycemic control levels of study participants at baseline and randomization.

|                                                           | Baseline          |                  |                  |          | Randomization     |                  |                  |          |
|-----------------------------------------------------------|-------------------|------------------|------------------|----------|-------------------|------------------|------------------|----------|
|                                                           | Overall<br>(n=75) | Active<br>(n=37) | Masked<br>(n=38) | <i>p</i> | Overall<br>(n=66) | Active<br>(n=30) | Masked<br>(n=36) | <i>p</i> |
| <b>Age (years)</b> , mean $\pm$ SD                        | 40.9 $\pm$ 13.1   | 42.6 $\pm$ 13.2  | 39.6 $\pm$ 12.9  | 0.31     | 40.8 $\pm$ 13.1   | 41.9 $\pm$ 14.0  | 39.8 $\pm$ 12.4  | 0.50     |
| <b>Sex (male)</b> , n (%)                                 | 44 (58.7%)        | 18 (51.4%)       | 26 (65.0%)       | 0.23     | 37 (56.0%)        | 14 (46.6%)       | 23 (63.8%)       | 0.19     |
| <b>Duration of diabetes (years)</b> , mean $\pm$ SD       | 19.1 $\pm$ 11.8   | 19.1 $\pm$ 11.9  | 19.0 $\pm$ 11.9  | 0.98     | 18.7 $\pm$ 11.3   | 17.0 $\pm$ 10.7  | 20.1 $\pm$ 11.8  | 0.24     |
| <b>Age at diabetes initiation (years)</b> , mean $\pm$ SD | 21.9 $\pm$ 13.2   | 23.5 $\pm$ 13.2  | 20.5 $\pm$ 13.1  | 0.34     | 22.0 $\pm$ 12.8   | 24.8 $\pm$ 12.6  | 19.7 $\pm$ 12.6  | 0.08     |
| <b>Weight (kg)</b> , mean $\pm$ SD                        | 74.5 $\pm$ 15.3   | 74.0 $\pm$ 15.4  | 75.1 $\pm$ 15.5  | 0.75     | 74.0 $\pm$ 15.2   | 73.2 $\pm$ 15.2  | 74.7 $\pm$ 15.4  | 0.66     |
| <b>Height (cm)</b> , mean $\pm$ SD                        | 168.9 $\pm$ 9.6   | 167.7 $\pm$ 9.6  | 170.0 $\pm$ 9.5  | 0.30     | 168.3 $\pm$ 9.7   | 166.6 $\pm$ 9.6  | 169.7 $\pm$ 9.7  | 0.16     |
| <b>Operating system, n (%)</b>                            |                   |                  |                  |          |                   |                  |                  |          |
| <b>Android®</b>                                           | 59 (78.7%)        | 30 (85.7%)       | 29 (72.5%)       |          | 51 (77.2%)        | 25 (83.3%)       | 26 (72.2%)       |          |
| <b>iOS®</b>                                               | 16 (21.3%)        | 5 (14.3%)        | 11 (27.5%)       |          | 15 (22.8%)        | 5 (16.7%)        | 10 (27.8%)       |          |
| <b>Glycemic control</b>                                   |                   |                  |                  |          |                   |                  |                  |          |
| <b>GMI, (%)</b>                                           | 7.6 $\pm$ 1.0     | 7.5 $\pm$ 1.0    | 7.6 $\pm$ 1.1    | 0.58     | 7.5 $\pm$ 0.7     | 7.6 $\pm$ 0.8    | 7.3 $\pm$ 0.7    | 0.20     |

|                     |            |            |            |             |            |            |            |             |
|---------------------|------------|------------|------------|-------------|------------|------------|------------|-------------|
| <b>TIR, (%)</b>     | 56.1 ±16.0 | 55.2 ±17.9 | 56.9 ±14.4 | <i>0.64</i> | 57.2 ±11.5 | 56.0 ±13.5 | 58.4 ±9.7  | <i>0.43</i> |
| <b>TBR 70, (%)</b>  | 3.7 ±6.2   | 3.8 ±3.6   | 2.6 ±2.6   | <i>0.08</i> | 3.2 ±2.9   | 2.7 ±2.7   | 3.6 ±3.0   | <i>0.17</i> |
| <b>TAR 180, (%)</b> | 39.4 ±16.2 | 41.0 ±18.4 | 38.0 ±14.0 | <i>0.42</i> | 39.8 ±15.3 | 42.9 ±16.3 | 37.1 ±14.0 | <i>0.13</i> |
| <b>CV, (%)</b>      | 36.5 ±6.4  | 36.9 ±6.1  | 36.10 ±6.8 | <i>0.75</i> | 37.5 ±6.5  | 36.8 ±7.0  | 38.1 ±6.0  | <i>0.41</i> |

Data are expressed as mean ±SD or n (%). *P*-values are calculated with the Student t-test test.

CV, coefficient of variation; GMI, glucose management indicator; SD, standard deviation; TAR, time above range; TBR, time below range; TIR, time in range.
